# Supplementary material
Source: ML conference proceedings conference paper supplement (https://proceedings.mlr.press/v97/whitehill19a.html)
Supplement: Supplementary file [file whitehill19a-supp.pdf]

Supplementary Material to “Automatic Classifiers as Scientific  
Instruments: One Step Further Away from Ground-Truth”

J. Whitehill and A. Ramakrishnan

## 1 Proofs

### 1.1 Proof of Proposition 2

We prove the proposition for the case that  $r < 0$ ; the case for  $r > 0$  is similar.

From Section III, we have that

$$\rho(\hat{\mathbf{u}}, \mathbf{v}) = qr + \hat{u}_3 \sqrt{1 - r^2}$$

Since each  $\hat{u}_i$  ( $i = 3, 4, \dots, n$ ) is a coordinate on an  $(n - 3)$ -sphere, it can be re-parameterized [Muller(1959)] by sampling  $n - 2$  standard normal random variables and normalizing, i.e.:

$$\hat{u}_i = \frac{\sqrt{1 - q^2} \times z_i}{\sqrt{\sum_{j=3}^n z_j^2}}$$

where each  $z_i \sim \mathbb{N}(0, 1)$ . A false positive correlation thus occurs when  $\hat{u}_3$  is at least  $c = |qr|/\sqrt{1 - r^2}$  more than its expected value  $qr$ :

$$\Pr[\hat{u}_3 \geq c] = \Pr \left[ \frac{\sqrt{1 - q^2} \times z_3}{\sqrt{\sum_{j=3}^n z_j^2}} \geq c \right]$$

Due to the inequality, we must handle the cases that  $z_3 \geq 0$  and  $z_3 < 0$  separately. Note that the latter case contributes 0 probability since  $c \geq 0$  and  $q > 0$ . Also, since  $z_3$  is a standard normal random variable,  $\Pr[z_3 \geq 0] = 0.5$ .

$$\begin{aligned} & \Pr[\hat{u}_3 \geq c] \\ &= \Pr \left[ \frac{\sqrt{1 - q^2} \times z_3}{\sqrt{\sum_{j=3}^n z_j^2}} \geq c \mid z_3 \geq 0 \right] \Pr[z_3 \geq 0] + \\ & \Pr \left[ \frac{\sqrt{1 - q^2} \times z_3}{\sqrt{\sum_{j=3}^n z_j^2}} \geq c \mid z_3 < 0 \right] \Pr[z_3 < 0] + \\ &= \frac{1}{2} \Pr \left[ \frac{\sqrt{1 - q^2} \times z_3}{\sqrt{\sum_{j=3}^n z_j^2}} \geq c \mid z_3 \geq 0 \right] + 0 \\ &= \frac{1}{2} \Pr \left[ (1 - q^2) z_3^2 \geq c^2 \sum_{j=3}^n z_j^2 \right] \end{aligned}$$

$$\begin{aligned}
&= \frac{1}{2} \Pr \left[ (1 - q^2 - c^2) \mathbf{z}_3^2 \geq c^2 \sum_{j=4}^n \mathbf{z}_j^2 \right] \\
&= \frac{1}{2} \Pr \left[ \mathbf{z}_3^2 \geq \frac{c^2}{(1 - q^2 - c^2)} \sum_{j=4}^n \mathbf{z}_j^2 \right]
\end{aligned}$$

For  $n > 3$ , each side of the inequality is a sum of squared normally distributed random variables, i.e., a  $\chi^2$ -random variable (though with different degrees of freedom). We can thus rewrite this probability as

$$\begin{aligned}
\Pr[\hat{u}_3 \geq c] &= \frac{1}{2} \Pr \left[ \chi_1^2 \geq \left( \frac{c^2}{1 - q^2 - c^2} \right) \chi_{(n-3)}^2 \right] \\
&= \frac{1}{2} \int_0^\infty f_1(t) F_{n-3} \left( \frac{1 - q^2 - c^2}{c^2} t \right) dt \\
&\doteq h(n, q, r)
\end{aligned}$$

where  $\chi_1^2$  and  $\chi_{(n-3)}^2$  are  $\chi^2$  random variables with 1 and  $(n - 3)$  degrees of freedom, respectively. The probability is equivalent to the integral because, for any value  $t$  of the  $\chi_1^2$  variable, we require that the  $\chi_{n-3}^2$  variable be less than  $t$  (after applying a scaling factor). To our knowledge, there is no closed formula for this integral, but we can compute it numerically. For  $n = 3$ , we have

$$\begin{aligned}
\Pr[\hat{u}_3 \geq c] &= \frac{1}{2} \Pr [(1 - q^2 - c^2) \mathbf{z}_3^2 \geq 0] \\
&= \frac{1}{2} \Pr [c^2 \leq 1 - q^2]
\end{aligned}$$

since a  $\chi^2$ -random variable is non-negative, and where the probability of  $c^2 \leq 1 - q^2$  is 1 if the inequality is true and 0 otherwise.

## 1.2 Proof of Proposition 3

For convenience, define  $\alpha = \frac{1 - q^2 - c^2}{c^2}$ .

$$\begin{aligned}
&h(n + 1, q, r) - h(n, q, r) \\
&= \int_0^\infty [f_1(t) F_{(n+1)-3}(\alpha t) - f_1(t) F_{n-3}(\alpha t)] dt \\
&= \int_0^\infty f_1(t) [F_{n-2}(\alpha t) - F_{n-3}(\alpha t)] dt
\end{aligned}$$

Ghosh [Ghosh(1973)] proved that, for any fixed  $t > 0$ ,  $\Pr[\chi_k^2 > t]$  is monotonically increasing in the degrees of freedom  $k$ ; hence,  $F_k(t)$  is monotonically decreasing in  $k$ . Therefore,  $F_{n-2}(\alpha t) - F_{n-3}(\alpha t) < 0$  for all  $t$ . Since  $f_k$  is a non-negative function for all  $k$ , then the integral in Equation 1 must be negative; hence,  $h$  is monotonically decreasing in  $n$  for every  $c > 0$  and  $q \in (0, 1]$ .

### 1.3 Proof of Proposition 4

First, we show that  $\alpha$  is monotonically decreasing in  $q^2$ :

$$\begin{aligned}
\alpha(q) &= \frac{1 - q^2 - c^2}{c^2} \\
&= \frac{1 - q^2 - q^2 r^2 / (1 - r^2)}{q^2 r^2 / (1 - r^2)} \\
&= \frac{(1 - r^2)(1 - q^2) - q^2 r^2}{q^2 r^2} \\
&= \frac{1 - r^2 - q^2}{q^2 r^2} \\
&= \frac{1 - r^2}{q^2 r^2} - \frac{1}{r^2}
\end{aligned}$$

The first term is monotonically decreasing in  $q^2$ , and the second term is constant in  $q^2$ .

Next, let  $\epsilon$  be a positive real number such that  $q + \epsilon \leq 1$ :

$$\begin{aligned}
&h(n, q + \epsilon, r) - h(n, q, r) \\
&= \int_0^\infty f_1(t) F_{n-3}(\alpha(q + \epsilon)t) dt - \\
&\quad \int_0^\infty f_1(t) F_{n-3}(\alpha(q)t) dt \\
&= \int_0^\infty f_1(t) [F_{n-3}(\alpha(q + \epsilon)t) - F_{n-3}(\alpha(q)t)] dt
\end{aligned}$$

Since  $F_{n-3}$  is monotonically *increasing*, then the expression in brackets is negative. Since  $f_1$  is non-negative, then the entire integral must be less than 0.

## 2 Sampling distribution $\Pr(\hat{q} \mid q, n)$

The sampling distribution can be computed exactly [Fisher(1915)], but this is computationally feasible only for small  $n$ . Hence, we use the approximation from Soper [Soper(1913)]: Let  $q$  denote the population Pearson correlation coefficient, and let  $\hat{q}$  denote the sample correlation from  $n$  data. Then

$$\begin{aligned}
\Pr(\hat{q} \mid q, n) &\propto (1 - \hat{q})^{m_1} (1 + \hat{q})^{m_2} \\
m_1 &= \frac{1}{2}(\lambda - 1)(1 - \mu_q) - 1 \\
m_2 &= \frac{1}{2}(\lambda - 1)(1 + \mu_q) - 1 \\
\lambda &= (1 - \mu_q^2) / \sigma_q^2
\end{aligned}$$

$$\begin{aligned}\sigma_q &= \frac{(1-q^2)}{\sqrt{n}} \left(1 + \frac{(1+5.5q^2)}{2n}\right) \\ \mu_q &= \sqrt{q^2 - \frac{c}{n} - \frac{c(1+5q^2)}{2n^2}} \\ c &= q^2(1-q^2)\end{aligned}$$

## References

- [Fisher(1915)] Fisher, R. A. Frequency distribution of the values of the correlation coefficient in samples from an indefinitely large population. *Biometrika*, 10(4):507–521, 1915.
- [Ghosh(1973)] Ghosh, B. Some monotonicity theorems for  $\chi^2$ ,  $F$  and  $t$  distributions with applications. *Journal of the Royal Statistical Society. Series B (Methodological)*, pp. 480–492, 1973.
- [Muller(1959)] Muller, M. E. A note on a method for generating points uniformly on  $n$ -dimensional spheres. *Communications of the ACM*, 2(4):19–20, 1959.
- [Soper(1913)] Soper, H. On the probable error of the correlation coefficient to a second approximation. *Biometrika*, 9(1/2):91–115, 1913.
